28  $\text{Ca}(\text{CH}_3\text{COO})_2$  group explained its better adsorption capacity. Meanwhile, compared with  $\text{CaCl}_2$ ,  
29  $\text{Ca}(\text{CH}_3\text{COO})_2$  was more environmentally friendly and eliminated the secondary pollution of  $\text{Cl}^-$  ions.  
30 Further, a new method to remove the bacteria from the aqueous solution was found.

## 31 **1. Introduction**

32 Bacterial pollution in drinking water is the main pollution. Contamination of bacteria can lead to  
33 food poisoning and disease. More than 1 million people die every year from water related diseases. At  
34 present, the size-exclusion mechanism is used as mainly way to remove contaminated bacteria in  
35 water sterilization and purification (1-4). The pore sizes of the cartilage or membranes need to be  
36 comparable to the bacterial size to remove bacteria in water. Despite all this ,the membranes are easily  
37 clogged. Therefore, efficient methods and novel materials for water purification are highly needed.  
38 The complex material made of silver nanofibers, carbon nanotubes, and cotton have been widely  
39 studied as efficiency and fast purification speed (5-8). In this paper, we report a new principle  
40 demonstration of bacteria removal using Na-MMT based on a novel adsorption mechanism.

41 *Sporosarcina pasteurii*, which is a type of gram-negative and aerobic bacteria, has widely been  
42 applied in soil improvement by microbially induced calcium carbonate precipitation (MICP) (9-13),  
43 and some specific applications were found in practice such as the strengthening of soft-coal reservoirs  
44 (14), the improvement of the liquefaction resistance of sands (15, 16), the prevention and control of  
45 sandstorm (17-19) and the improvement of the environment as a dust suppressant (20). However, the  
46 porosity of soil could be blocked in the presence of bacteria, indicating the importance of the uniform  
47 distribution of bacteria within soil, which also leads to the extensive investigations of the adsorption  
48 of bacteria onto the mineral surface.

49 As aforementioned, numerous studies have focused on the adsorption of bacteria onto the mineral  
50 surface of the soil with various components such as Montmorillonite and Kaolinite (21, 22) as well as  
51 organic and inorganic mineral (23). Previous literature reported that the adsorption of bacteria onto the  
52 mineral surface played an important role in the bio-mineralization, bacterial distribution, bacterial  
53 activity and biodegradation (24). Meanwhile, the transport of bacteria controlled the migration of  
54 various pollutants including inorganic and organic pollutants as well as heavy metals. Thus, it is of

55 great significance to understand the adsorption mechanism of bacteria onto the mineral surface, and  
56 several factors were identified to contribute to the sorption of bacteria (e.g., salt concentrations, pH,  
57 ionic strength and temperature) (24, 25). For instance, it is reported that also the adsorption capacity of  
58 bacteria onto the corundum was weakened with the growth of ionic strength and pH (23). Meanwhile,  
59 A. L. Mills et al. (26) found that the high salt concentrations led to more adsorption of bacteria onto  
60 the quartz surface, whereas D. Jiang et al. (27) demonstrated that the best attraction between bacteria  
61 and clay occurred when the temperature ranged from 15 to 35 °C.

62 Several studies confirmed that the calcium source is of great importance.  $\text{CaCl}_2$  was widely  
63 investigated and mainly used to change the ionic strength during the adsorption process (28-31).  
64 However, other calcium sources are also investigated by the researchers. J. Xu et al. (32) discovered  
65 that the biochemical properties of bacteria were strongly influenced by different calcium sources, and  
66 higher bacterial activity was found when the calcium lactate introduced in the MICP process.  
67 Meanwhile, the result also showed that the size and morphology of crystal were different in the  
68 presence of different calcium sources. Besides, the main component of the  $\text{CaCO}_3$  precipitates was  
69 identified as calcite when different calcium sources were used, and the results were also in line with  
70 another study (28). P. Li and W. Qu (31) demonstrated that the calcium acetate and calcium chloride  
71 presented the same effect on the repairing of the cracks and the strength boost of concrete in the MICP  
72 process, however, Y. Zhang et al. (33) reported that the higher compressive strength of samples was  
73 obtained with the addition of calcium acetate source in porous media. Similarly, K. V. Tittelboom et al.  
74 (34) used calcium acetate, calcium chloride and calcium nitrate to repair the cracked concrete, and the  
75 results presented that these three calcium sources revealed almost the same performance in view of the  
76 water permeability reduction.

77 It is well recognized that the durability of reinforced concrete was affected by the formation of  
78 cracks in concrete structures, which can be attributed to the degassed and electrochemistry corrosion  
79 caused by the chloride ions penetration through the cracks (35). Therefore, it is necessary to apply  
80 other organic calcium sources (e.g.,  $\text{Ca}(\text{CH}_3\text{COO})_2$ ) instead of  $\text{CaCl}_2$ , which will reduce the adverse  
81 effects owing to the  $\text{Cl}^-$  ions penetration within the samples, albeit  $\text{CaCl}_2$  has been widely studied for

82 the adsorption of bacteria on the minerals. However, the effect of different calcium sources was rarely  
83 studied, and the detailed processes in terms of the adsorption of bacteria onto the mineral surface  
84 involving the  $\text{Ca}^{2+}$  ions was still unknown.

85 Given the foregoing, with different calcium sources introduced, the adsorption of bacteria onto  
86 the Na-montmorillonite (Na-MMT) surface was studied with several parameters investigated  
87 including the time, bacterial concentration, temperature and pH by batch experiments. At the same  
88 time, the desorption of bacteria on the Na-MMT was also investigated. Further, the adsorption  
89 mechanism of bacteria onto the Na-MMT surface containing different calcium sources was clarified  
90 by means of Brunner–Emmet–Teller (BET), Fourier Transform infrared spectroscopy (FTIR) and the  
91 Zeta potential measurement. Finally, the morphology of bacteria adsorbed on the Na-MMT surface  
92 was also facilitated by the use of Cryo-SEM.

## 93 **2. Materials, preparation of bacteria and Methodologies**

### 94 **2.1 Materials**

#### 95 **2.1.1 *Bacterium* and Culturing**

96 The bacteria used was purchased from Shanghai Fusheng industrial Reagent Co., Ltd, and was  
97 characterized as a strain of *Sporosarcina pasteurii*. The colonies of the bacteria were inoculated into  
98 1000 mL of CASO+20 g/L urea medium and were shaken ( $120 \text{ rev minutes}^{-1}$ ) at 301.15 K for 24  
99 hours. The culture medium was centrifuged at  $8000 \text{ rev minutes}^{-1}$  at 277.15 K for 10 min to obtain the  
100 bacteria. Then, the bacteria were washed for three times by the sterilized distilled-deionized (DDI)  
101 water and were resuspended in DDI. Then  $8.101 \text{ mol L}^{-1}$   $\text{CaCl}_2$  and  $\text{Ca}(\text{CH}_3\text{COO})_2$  solution was  
102 prepared to obtain a known concentration of bacterial suspension. The concentration of  $\text{Ca}^{2+}$  ion was  
103 optimized through experiments. The optical density (OD) of bacteria at 600 nm wavelength was  
104 analyzed by a UV–vis spectrophotometer (UV-752, China), and the bacterial concentration followed  
105 an optical density at 600 nm ( $\text{OD}_{600}$ ).

#### 106 **2.1.2 Mineral**

107 The Na-MMT was purchased from Zhejiang Fenghong new materials Co., Ltd. The physical and  
108 chemical properties of the Na-MMT were characterized by XRD, FTIR and XRF, as listed in Fig. S1

109 (A), Fig. S1 (B), Table S1 and Table S2, respectively.

## 110 **2.2 Preparation of Bacteria in the Adsorption and Desorption Experiments**

111 A series of sorption experiments was performed to investigate the adsorption of bacteria on the  
112 Na-MMT surface with  $\text{CaCl}_2$  and  $\text{Ca}(\text{CH}_3\text{COO})_2$  introduced as a function of time, bacterial  
113 concentration, temperature and pH. The bacteria were centrifuged and resuspended ( $\text{OD}_{600}=1.5$ ) by  
114  $8.101 \text{ mol L}^{-1}$   $\text{CaCl}_2$  and  $\text{Ca}(\text{CH}_3\text{COO})_2$  solution, respectively. The mixture of 0.4 grams of Na-MMT  
115 and 100 grams of suspension solution ( $\text{OD}_{600}=1.5$ ) was stirred at  $240 \text{ rev minutes}^{-1}$  for 20 min to  
116 investigate the effect of the time change (i.e., 0 min to 120 min), temperature (i.e., 293 K - 333 K) and  
117 pH (i.e., 7-11) on the bacterial adsorption onto the mineral. To study the influence of the initial  
118 bacterial concentrations on the adsorption of the bacteria, the mixture of 0.4 grams of Na-MMT and  
119 100 grams of suspension solution ( $\text{OD}_{600}=0.5, 1.0, 1.5$  and  $2.0$ ) was stirred at  $240 \text{ rev minutes}^{-1}$  for 20  
120 minutes. The amount of bacterial adsorbed onto the mineral was calculated by subtracting the current  
121 bacterial concentration from the initial amount of bacteria added (without any bacterial adsorption).

122 The mixture of 0.4 grams of Na-MMT and 100 grams of suspension solution prepared by DDI  
123 ( $\text{OD}_{600}=0.5, 1.0$  and  $1.5$ ) was stirred at  $240 \text{ rev minutes}^{-1}$  for 20 minutes. The concentration of  
124 bacteria (D1) was measured until the values were stable. The desorption experiments of bacteria were  
125 conducted by shaking the suspension solution at  $120 \text{ rev minutes}^{-1}$  for 2 hours. The concentration of  
126 bacteria (D2) was then measured again until no significant changes occurred in the values. The  
127 percentage of bacterial desorption (W) was calculated by Eq. (1).

$$128 \quad W = \frac{D2-D1}{D1} \times 100\% \quad (1)$$

## 129 **2.3 Methodologies**

### 130 **2.3.1 Fourier Transform Infrared Spectra (FTIR)**

131 FTIR (Thermo Scientific Nicolet iS5) was employed to characterize the adsorption mechanism of  
132 bacteria onto the Na-MMT surface. The mixture of 2 mg of powder sample and 200 mg of pure KBr  
133 was ground evenly and was then placed into the mold. The mixture was pressed into a transparent  
134 sheet by the hydraulic press and was put into the infrared spectrometer for the test with a wavenumber  
135 range of  $4000\text{-}400\text{cm}^{-1}$ , scanning times of 32 and a resolution of  $4\text{cm}^{-1}$ .

### 136 **2.3.2 Cryo-Scanning Electron Microscope (SEM)**

137 Cryo-scanning electron microscope (Cryo-SEM, FEI Quanta 450) was used to observe the image  
138 of the Na-MMT surface with the introduction of calcium sources. The powder samples were frozen for  
139 30 seconds in liquid nitrogen snow mud, and then was sputtered with 10 mA current for 60 seconds,  
140 after sublimation at 363 K for 10 minutes. Then, the platinum was sprayed on the surface of the  
141 sample. Finally, the sample was involved in SEM for observation with a 5 kV of accelerating voltage.

### 142 **2.3.3 Electrokinetic and Surface Characterization of Mineral**

143 The minerals (i.e., Na-MMT, Na-MMT with  $\text{Ca}(\text{CH}_3\text{COO})_2$  and  $\text{CaCl}_2$ ) were diluted in the  
144 deionized water to ensure the final concentration between 5-10  $\text{mg mL}^{-1}$ . Then, the Zeta-potential  
145 values of minerals were measured at 298 K by a zeta potential analyzer (Malvern Zetasizer Nano  
146 ZS90). All experiments were repeated for 3 times at a pH of 8. The specific surface area and the  
147 adsorption cumulative volume of pores within the minerals were obtained by  $\text{N}_2$  adsorption (Mike  
148 2020).

## 149 **3. Results**

### 150 **3.1 Adsorption and Desorption of Bacteria onto the Na-MMT Surface**

151 The amount of bacterial adsorption onto the Na-MMT surface at a pH of 8.5 was almost the same  
152 when different calcium sources (i.e.,  $\text{CaCl}_2$  and  $\text{Ca}(\text{CH}_3\text{COO})_2$ ) were introduced (Fig.1 (a)). The  
153 adsorption of bacteria proceeded rapidly in the first 30 minutes but the process slowed down after 30  
154 minutes. Eventually, the bacteria were completely adsorbed onto the Na-MMT surface. It may be due  
155 to a change in the adsorption process between the surfaces with bacteria and mineral. Because the  
156 adsorption of bacteria is driven by the release of counterions to the charges on the bacteria and the  
157 surface (36)

158 The amount of bacterial sorption on the Na-MMT surface increased with the growth of bacteria  
159 concentration (Fig.1 (b)). When the  $\text{OD}_{600}$  of bacteria were 0.5, 1.0 and 1.5, the bacteria were almost  
160 completely absorbed under different calcium sources, whereas when the  $\text{OD}_{600}$  of bacteria was 2.0, the  
161 percentage of bacteria adsorbed by Na-MMT was only 86.5 % and 83.5 % with the introduction of  
162  $\text{Ca}(\text{CH}_3\text{COO})_2$  and  $\text{CaCl}_2$ , respectively. The reason could be that adsorption capacity of bacteria onto

163 Na-MMT surface has reached the saturation value.

164 Fig.1 (c) shows that the adsorption of bacteria on the Na-MMT surface with different calcium  
165 sources were dependent on the temperature. A significant change was observed with the increment of  
166 the temperature. However, instead of an increase, the number of bacterial sorption decreased at 313 K,  
167 and further investigations should be performed with respect to this trend.

168 The adsorption of bacteria on the Na-MMT surface was significantly affected by the pH under  
169 different calcium sources, as shown in Fig.1 (d)). With  $\text{CaCl}_2$  and  $\text{Ca}(\text{CH}_3\text{COO})_2$  introduced, when the  
170 pH increased from 7 to 11, a gradual reduction in the bacterial adsorption onto the Na-MMT surface  
171 was seen. Meanwhile, compared to  $\text{CaCl}_2$ , a larger volume of bacteria were adsorbed onto the mineral  
172 surface with the introduction of  $\text{Ca}(\text{CH}_3\text{COO})_2$ , as shown in Fig. 1, which could be attributed to the  
173 fact that the growth of pH led to the increase of electrostatic repulsion both on the surface of minerals  
174 and the bacteria (24).

175 The mixture of bacteria and Na-MMT was shaken at 120 rpm for 2 hours to determine the  
176 percentage of sorption for bacteria. Then, the percentage of desorption for bacteria has been calculated.  
177 When the  $\text{OD}_{600}$  was 0.5, 1.0 and 1.5, nearly no bacteria were released from the Na-MMT surface  
178 with different calcium sources introduced (the data was shown in Fig.2S), thus suggesting that the  
179 bacteria were strongly retained by the Na-MMT surface in the presence of  $\text{Ca}^{2+}$  ions. This  
180 phenomenon is attributed to strong adsorption of bacteria on mineral by chemical interaction.

### 181 **3.2 Kinetic and Isotherm of Bacteria Adsorption**

182 The pseudo-second-order kinetic model was applied in terms of the adsorption of bacteria onto  
183 the Na-MMT surface with different calcium sources introduced (Fig.2 (a)). The experimental data  
184 were in line with a pseudo-second-order kinetic model (Table. S3). The correlation coefficients ( $R^2 >$   
185 0.99) indicate that the sorption process of bacteria onto the Na-MMT surface may be ascribed to  
186 chemisorption (37, 38). Meanwhile, the results also suggest that when different calcium sources were  
187 introduced, the overall rate of the adsorption process was controlled by the chemical adsorption when  
188 the bacteria were present (39, 40).

189 With different calcium sources introduced, the adsorption of bacteria onto the Na-MMT surface

190 followed a Langmuir isotherm model (Fig.2 (b)). The experiment data fitted well with the Langmuir  
191 isotherm model (Table. S3). In the Na-MMT-Ca(CH<sub>3</sub>COO)<sub>2</sub> group, the Langmuir constant K<sub>L</sub> was  
192 12.2 % smaller than that of Na-MMT-CaCl<sub>2</sub> group, indicating that more energy was released with  
193 respect to the adsorption of bacteria where Ca(CH<sub>3</sub>COO)<sub>2</sub> was added, in comparison with CaCl<sub>2</sub>. In  
194 view of the above findings, it can be inferred that the sorption capacity of the Na-MMT involving  
195 Ca(CH<sub>3</sub>COO)<sub>2</sub> was greater than that with CaCl<sub>2</sub>. The detailed explanation will be presented in section  
196 result.

### 197 **3.3 FTIR Analysis of Adsorption**

198 The FTIR analysis of selected samples was exhibited in Fig. 3. The adsorption bands of the  
199 mineral were analyzed as follows. The peak 1040 cm<sup>-1</sup> in the curves can be assigned to the Si-O  
200 stretching vibrations, whereas the peaks, 469, 523 and 917 cm<sup>-1</sup> were due to the Si-O-Si bending  
201 vibration. For the bacteria, CH<sub>2</sub> asymmetric stretching vibration was observed at 2936 cm<sup>-1</sup>, and the  
202 presence of C=O contributed to the peak 1655 cm<sup>-1</sup>. The peak 1403 cm<sup>-1</sup> and 1059 cm<sup>-1</sup> can be  
203 ascribed to the presence of C-O bending and polysaccharide. The experimental data indicated that the  
204 Si-O stretching vibrations and the Si-O-Si bending vibration of the Na-MMT were almost the same  
205 with the introduction of CaCl<sub>2</sub> or Ca(CH<sub>3</sub>COO)<sub>2</sub>. Besides, the peaks 3410 cm<sup>-1</sup> (3449 cm<sup>-1</sup>) and 1641  
206 cm<sup>-1</sup> (1642 cm<sup>-1</sup>) were due to the symmetric stretching and bending vibrations of the water molecules  
207 on the Na-MMT-Ca(CH<sub>3</sub>COO)<sub>2</sub> group (Na-MMT-CaCl<sub>2</sub> group). Meanwhile, the FTIR curve also  
208 shows that after the sorption of bacteria, the functional group position of the water molecules on the  
209 Na-MMT-Ca(CH<sub>3</sub>COO)<sub>2</sub> group (Na-MMT- CaCl<sub>2</sub> group) shifted from 3420 to 3424 cm<sup>-1</sup> (3440 to  
210 3422 cm<sup>-1</sup>) and from 1641 to 1645 cm<sup>-1</sup> (1642 to 1654 cm<sup>-1</sup>), respectively. In view of the  
211 aforementioned findings, it is suggested that the water molecules on the Na-MMT surface played an  
212 important role in the sorption process. Moreover, the CH<sub>2</sub> asymmetric stretching vibration and the  
213 C=O were observed on the mineral-Ca(CH<sub>3</sub>COO)<sub>2</sub>-bacteria and mineral-CaCl<sub>2</sub>-bacteria, confirming  
214 the adsorption of bacteria onto the Na-MMT surface, and Ca(CH<sub>3</sub>COO)<sub>2</sub> and CaCl<sub>2</sub> show a similar  
215 mechanism with regard to the adsorption of bacteria onto the Na-MMT surface. The wavelength  
216 number of mineral and bacteria was shown in Table. S4.



### 217 **3.4 SEM Analysis of Bacterial Adsorption**

218 The images of bacterial adsorption on the Na-MMT surface were observed by the use of  
219 Cryo-SEM (Fig. 4). Compared to CaCl<sub>2</sub> (Fig. 4(c) and 4(d)), the images suggested that Ca(CH<sub>3</sub>COO)<sub>2</sub>  
220 presented a tendency to aggregate the Na-MMT and led to the formation of larger particles during the  
221 bacterial adsorption process (Fig. 4(a) and 4(b)). The bacteria were mainly attached onto the Na-MMT  
222 surface in the presence of Ca(CH<sub>3</sub>COO)<sub>2</sub> and CaCl<sub>2</sub>. The images (Fig. 4(b) and (c)) indicate that  
223 although different calcium sources were introduced, the adsorption mechanism of bacteria onto the  
224 Na-MMT surface was similar.

### 225 **3.5 BET Analysis of Bacterial Adsorption**

226 The specific surface area of the Na-MMT increased in the presence of CaCl<sub>2</sub> and Ca(CH<sub>3</sub>COO)<sub>2</sub>  
227 (Fig. 5 (a)). The results showed that the specific surface area affects the adsorption of bacteria onto the  
228 Na-MMT surface to some degree. The Na-MMT with Ca(CH<sub>3</sub>COO)<sub>2</sub> adsorbed a greater amount of  
229 bacteria than that with CaCl<sub>2</sub>, although the Na-MMT with Ca(CH<sub>3</sub>COO)<sub>2</sub> presents a smaller SSA than  
230 that with CaCl<sub>2</sub>. Therefore, considering this, it is implied that the specific surface area may not be the  
231 major contributor to the bacterial adsorption onto the Na-MMT surface, which could be related to the  
232 non-electrostatic force dominating the bacteria adsorption onto the Na-MMT surface. Meanwhile, the  
233 hysteresis loop of the isotherm adsorption line of mineral followed H3 type. Besides, the results also  
234 indicated that the adsorption characteristics of the Na-MMT failed to change significantly with  
235 different calcium sources introduced (i.e., CaCl<sub>2</sub> and Ca(CH<sub>3</sub>COO)<sub>2</sub>). Further, it is demonstrated that a  
236 large number of pores were seen in these minerals (Fig. 5 (b)), and the cumulative volume of the pores  
237 within the Na-MMT increased with the introduction of Ca(CH<sub>3</sub>COO)<sub>2</sub>, while a reduction was seen in  
238 the pore volume within the mineral with CaCl<sub>2</sub>. Therefore, the cumulative volume of pores within the  
239 Na-MMT might not be a major factor as well in the determination of the bacteria adsorption onto the  
240 mineral.

## 241 **4. Discussions**

242 Absorption refers to the process by which one material occupies another one through the small  
243 pores or spaces between them, which involves the whole volume of materials, whereas adsorption is

244 defined as the process where the atoms, ions or molecules from a gas, liquid or dissolved solid adhere  
245 to the surface, and only the surface area of material is involved. Due to the small interlayer spacing of  
246 Na-MMT (i.e., 0-10 nm) (41, 42) and the larger size of bacteria (3-5  $\mu\text{m}$ ), the bacteria were only  
247 thought to be adsorbed on the Na-MMT surface instead of throughout the whole mineral. Moreover,  
248 the experimental data show the amount of bacteria adsorbed on the Na-MMT surface increase with  
249 increasing temperature, which is a typical adsorption phenomenon. Langmuir Equation was well fitted  
250 by the experimental data, which confirms that the adsorption of bacteria onto the Na-MMT surface  
251 was single molecular layer adsorption. The results of FTIR spectra showed that the vibration peak of  
252 water molecules was significantly different during the adsorption process, proving that the hydrogen  
253 bonds played an important role.

254 The Fig 6 shows that the zeta potential shifted from -26.3 mv to -13 mv in the presence of  
255  $\text{Ca}(\text{CH}_3\text{COO})_2$ , whereas a similar shift was also observed in the presence of  $\text{CaCl}_2$  (i.e., from -26.3 mv  
256 to -14.2 mv), accounting for the volume increase of bacteria adsorbed onto the Na-MMT surface due  
257 to the introduction of  $\text{Ca}^{2+}$  ions. The absolute value of zeta potential on the Na-MMT surface in the  
258 presence of  $\text{Ca}(\text{CH}_3\text{COO})_2$  (-13 mv) was smaller than that  $\text{CaCl}_2$  (-14.2 mv), explaining the superior  
259 performance of  $\text{Ca}(\text{CH}_3\text{COO})_2$  than  $\text{CaCl}_2$  regarding the adsorption of bacteria onto the Na-MMT  
260 surface. The adsorption of bacteria on the minerals is mainly affected by the electrostatic and  
261 non-electrostatic forces. The electrostatic force is generated by the Coulomb force interaction between  
262 two charged substances, while the non-electrostatic force is generated by the Van der Waals force,  
263 Hydrophobic interaction and Hydrogen bond. Due to the negative charge of Na-MMT surface and  
264 bacteria, we considered that electrostatic force is not conducive to bacterial adsorption on the  
265 Na-MMT surface. The experimental data showed that the addition of  $\text{Ca}^{2+}$  ions significantly increased  
266 the number of bacteria adsorbed on the Na-MMT surface. With the introduction of  $\text{Ca}^{2+}$  ions, the  
267 negative charges of the Na-MMT surface decreased significantly (Fig. 6). Therefore, the above  
268 findings also imply that the non-electrostatic force may dominate in the bacterial adsorption onto the  
269 Na-MMT surface compared with the electrostatic interaction. K. S. Zerda et al. (43) and S.  
270 Chattopadhyay and R. W. Puls (44) also found that virus adsorption on silica and the adsorption of

271 bacteriophages on and kaolinite were mainly govern by the non-electrostatic forces. The experimental  
272 data of FTIR showed an obvious change was observed in the functional groups of the water molecules  
273 on the mineral after the bacterial adsorption. As reported, the hydrogen bonds between two interacting  
274 bodies were formed by these shifts (45, 46).

275 The adsorption of bacteria onto the mineral surface across a range of temperatures (303 to 333 K)  
276 with addition of 8.1 mmol/L  $\text{Ca}^{2+}$  ions is shown in Fig 7. The parameter values of  $\Delta S^0$  and  $\Delta H^0$  can  
277 be calculated through the slope and intercept, respectively. The thermodynamics parameter values of  
278 Na-MMT are listed in Table S5. As  $\Delta G^0 < 0$ , the adsorption of bacteria onto the Na-MMT surface was  
279 spontaneous. P. D. Ross and S. Subramanian (47) reported that the hydrogen bond may cause negative  
280 enthalpy, while ion interaction and hydrophobic interaction may result in positive enthalpy. A value of  
281  $\Delta H^0 > 0$  indicated that the bacterial adsorption was affected by van der Waals force and hydrophobic  
282 interaction. Thus, confirming that the non-electrostatic forces presented an important effect on the  
283 adsorption of bacteria onto the Na-MMT surface. The adsorption process of bacteria onto Na-MMT  
284 surface is schematically illustrated in Fig 8.

285 The growth of pH increased the negative charge both on the surface of minerals and the bacteria  
286 (24). Due to the increment of the repulsive electrostatic force, a reduction was seen in the bacteria  
287 adsorption onto the mineral surface as pH increased. The images of SEM showed that the aggregates  
288 of the Na-MMT involving  $\text{Ca}(\text{CH}_3\text{COO})_2$  were much denser than that with  $\text{CaCl}_2$ , indicating that in  
289 comparison with  $\text{CaCl}_2$ , a larger volume of bacteria were adsorbed onto the mineral with  
290  $\text{Ca}(\text{CH}_3\text{COO})_2$ , which can be assigned to the smaller value of the Langmuir parameter  $K_L$  in this  
291 group, indicating a stronger affinity of bacteria for the Na-MMT containing  $\text{Ca}(\text{CH}_3\text{COO})_2$ . Almost no  
292 bacteria were desorbed, which could be assigned to the chemical interaction that could result in strong  
293 adsorption of bacteria onto the mineral surfaces and low mobility of those adsorbed bacteria.

## 294 **5. Conclusions**

295 As the Na-MMT with  $\text{Ca}(\text{CH}_3\text{COO})_2$  presented a higher affinity for the bacteria than  $\text{CaCl}_2$ ,  
296  $\text{Ca}(\text{CH}_3\text{COO})_2$  outperformed  $\text{CaCl}_2$  in terms of the bacterial adsorption onto the Na-MMT surface.  
297 The adsorption of bacteria onto the Na-MMT surface was identified as chemical adsorption, and it is

298 mainly governed by the non-electrostatic forces (i.e., the van der Waals force, hydrophobic interaction  
299 and hydrogen bonding) and electrostatic forces with addition of  $\text{Ca}^{2+}$ . The specific surface area of  
300 Na-MMT increased with the addition of  $\text{Ca}^{2+}$  ions, and the adsorption of bacteria was also affected by  
301 the specific surface area of minerals, but it is not a main contributor.

## 302 **Acknowledgement**

303 This work was financially supported by Research Foundation of Key Laboratory of Deep  
304 Geodrilling Technology, Ministry of Natural Resources [No. KF2019X] and Fouling mechanism and  
305 control method of inner wall of core drill pipe [No. 41772388].

## 306 **Conflict of interest**

307 The authors declared that they have no conflicts of interest to this work. We declare that we do  
308 not have any commercial or associative interest that represents a conflict of interest in connection with  
309 the work submitted.

## 310 **References**

- 311 1. Liu S, Zeng TH, Hofmann M, Burcombe E, Wei J, Jiang R, Kong J, Chen Y. 2011. Antibacterial  
312 Activity of Graphite, Graphite Oxide, Graphene Oxide, and Reduced Graphene Oxide: Membrane  
313 and Oxidative Stress. *Acs Nano* 5:6971-6980.
- 314 2. Song WH, Ryu HS, Hong SH. 2008. Antibacterial properties of Ag (or Pt)-containing calcium  
315 phosphate coatings formed by micro-arc oxidation. *Journal of Biomedical Materials Research Part*  
316 *A* 88A:246-254.
- 317 3. Wieprecht T, Apostolov O, Beyermann M, Seelig J. 2000. Membrane Binding and Pore Formation  
318 of the Antibacterial Peptide PGLa: Thermodynamic and Mechanistic Aspects †. *Biochemistry*  
319 39:442-452.
- 320 4. Zeng X, Mccarthy DT, Deletic A, Zhang X. 2015. Silver/Reduced Graphene Oxide Hydrogel as Novel  
321 Bactericidal Filter for Point-of-Use Water Disinfection. *Advanced Functional Materials*  
322 25:4344-4351.
- 323 5. YOON KY, BYEON JH, PARK CW, HWANG J. 2008. Antimicrobial Effect of Silver Particles on Bacterial  
324 Contamination of Activated Carbon Fibers. *Environmental Science & Technology* 42:1251-1255.
- 325 6. Schoen DT, Schoen AP, Hu L, Kim HS, Heilshorn SC, Cui Y. 2010. High Speed Water Sterilization  
326 Using One-Dimensional Nanostructures. *Nano Letters* 10:3628-3632.
- 327 7. Birbir Y, Ur G, Birbir M. 2008. Inactivation of bacterial population in hide-soak liquors via direct  
328 electric current. *Journal of Electrostatics* 66:355-360.
- 329 8. Jain P, Pradeep T. 2005. Potential of silver nanoparticle-coated polyurethane foam as an  
330 antibacterial water filter. *Biotechnology & Bioengineering* 90:59-63.
- 331 9. Cheng L, Cord-Ruwisch R. 2014. Upscaling Effects of Soil Improvement by Microbially Induced  
332 Calcite Precipitation by Surface Percolation. *Geomicrobiology Journal* 31:396-406.

- 333 10. DeJong JT, Mortensen BM, Martinez BC, Nelson DC. 2010. Bio-mediated soil improvement.  
334 Ecological Engineering 36:197-210.
- 335 11. García-González J, Rodríguez-Robles D, Wang J, De Belie N, Morán-del Pozo JM, Guerra-Romero  
336 MI, Juan-Valdés A. 2017. Quality improvement of mixed and ceramic recycled aggregates by  
337 biodeposition of calcium carbonate. Construction and Building Materials 154:1015-1023.
- 338 12. Kakelar MM, Ebrahimi S, Hosseini M. 2016. Improvement in soil grouting by biocementation  
339 through injection method. Asia-Pacific Journal of Chemical Engineering 11:930-938.
- 340 13. Umar M, Kassim KA, Ping Chiet KT. 2016. Biological process of soil improvement in civil  
341 engineering: A review. Journal of Rock Mechanics and Geotechnical Engineering 8:767-774.
- 342 14. Song C, Elsworth D. 2018. Strengthening mylonitized soft-coal reservoirs by microbial  
343 mineralization. International Journal of Coal Geology 200:166-172.
- 344 15. Xiao P, Liu H, Xiao Y, Stuedlein AW, Evans TM. 2018. Liquefaction resistance of bio-cemented  
345 calcareous sand. Soil Dynamics and Earthquake Engineering 107:9-19.
- 346 16. Zamani A, Montoya BM. 2018. Undrained Monotonic Shear Response of MICP-Treated Silty Sands.  
347 Journal of Geotechnical and Geoenvironmental Engineering 144:04018029.
- 348 17. Maleki M, Ebrahimi S, Asadzadeh F, Emami Tabrizi M. 2016. Performance of microbial-induced  
349 carbonate precipitation on wind erosion control of sandy soil. International Journal of  
350 Environmental Science and Technology 13:937-944.
- 351 18. Tian K, Wu Y, Zhang H, Li D, Nie K, Zhang S. 2018. Increasing wind erosion resistance of aeolian  
352 sandy soil by microbially induced calcium carbonate precipitation. Land Degradation &  
353 Development 29:4271-4281.
- 354 19. Wang Z, Zhang N, Ding J, Lu C, Jin Y. 2018. Experimental Study on Wind Erosion Resistance and  
355 Strength of Sands Treated with Microbial-Induced Calcium Carbonate Precipitation. Advances in  
356 Materials Science and Engineering 2018:1-10.
- 357 20. Naeimi M, Chu J. 2017. Comparison of conventional and bio-treated methods as dust  
358 suppressants. Environ Sci Pollut Res Int 24:23341-23350.
- 359 21. Hong Z, Rong X, Cai P, Dai K, Liang W, Chen W, Huang Q. 2012. Initial adhesion of *Bacillus subtilis*  
360 on soil minerals as related to their surface properties. European Journal of Soil Science  
361 63:457-466.
- 362 22. Zhou X, Huang Q, Chen S, Yu Z. 2005. Adsorption of the insecticidal protein of *Bacillus*  
363 *thuringiensis* on montmorillonite, kaolinite, silica, goethite and Red soil. Applied Clay Science  
364 30:87-93.
- 365 23. Zhao WQ, Liu X, Huang QY, Rong XM, Liang W, Dai K, Cai P. 2012. Sorption of *Streptococcus suis*  
366 various soil particles from an Alfisol and effects on pathogen metabolic activity. European Journal  
367 of Soil Science 63:558-564.
- 368 24. Rong X, Huang Q, He X, Chen H, Cai P, Liang W. 2008. Interaction of *Pseudomonas putida* with  
369 kaolinite and montmorillonite: a combination study by equilibrium adsorption, ITC, SEM and FTIR.  
370 Colloids Surf B Biointerfaces 64:49-55.
- 371 25. Hong Z, Rong X, Cai P, Liang W, Huang Q. 2011. Effects of Temperature, pH and Salt  
372 Concentrations on the Adsorption of *Bacillus subtilis* on Soil Clay Minerals Investigated by  
373 Microcalorimetry. Geomicrobiology Journal 28:686-691.

- 374 26. Mills AL, Herman JS, Hornberger GM, Dejesús TH. 1994. Effect of Solution Ionic Strength and Iron  
375 Coatings on Mineral Grains on the Sorption of Bacterial Cells to Quartz Sand. *Applied &*  
376 *Environmental Microbiology* 60:3300-3306.
- 377 27. Jiang D, Huang Q, Cai P, Rong X, Chen W. 2007. Adsorption of *Pseudomonas putida* on clay  
378 minerals and iron oxide. *Colloids & Surfaces B Biointerfaces* 54:217-221.
- 379 28. De Muynck W, Cox K, Belie ND, Verstraete W. 2008. Bacterial carbonate precipitation as an  
380 alternative surface treatment for concrete. *Construction and Building Materials* 22:875-885.
- 381 29. Pacheco-Torgal F, Labrincha JA. 2013. Biotech cementitious materials: Some aspects of an  
382 innovative approach for concrete with enhanced durability. *Construction & Building Materials*  
383 40:1136-1141.
- 384 30. Wiktor V, Jonkers HM. Quantification of crack-healing in novel bacteria-based self-healing  
385 concrete. *Cement & Concrete Composites* 33:763-770.
- 386 31. Li P, Qu W. 2010. Remediation of concrete cracks by bacterially-induced calcium carbonate  
387 deposition. *China Civil Engineering Journal*.
- 388 32. Xu J, Du Y, Jiang Z, She A. 2015. Effects of Calcium Source on Biochemical Properties of Microbial  
389 CaCO<sub>3</sub> Precipitation. *Front Microbiol* 6:1366.
- 390 33. Zhang Y, Guo HX, Cheng XH. 2014. Influences of calcium sources on microbially induced carbonate  
391 precipitation in porous media. *Materials Research Innovations* 18:S2-79-S2-84.
- 392 34. Tittelboom KV, Belie ND, Muynck WD, Verstraete W. 2010. Use of bacteria to repair cracks in  
393 concrete. *Cement & Concrete Research* 40:157-166.
- 394 35. Verma SK, Bhadauria SS, Akhtar S. 2013. Evaluating effect of chloride attack and concrete cover  
395 on the probability of corrosion. *Frontiers of Structural & Civil Engineering* 7:379-390.
- 396 36. Kügler R, Bouloussa O, Rondelez F. 2005. Evidence of a charge-density threshold for optimum  
397 efficiency of biocidal cationic surfaces. *Microbiology* 151:1341-1348.
- 398 37. Yu Q, Zhang R, Deng S, Huang J, Yu G. 2009. Sorption of perfluorooctane sulfonate and  
399 perfluorooctanoate on activated carbons and resin: Kinetic and isotherm study. *Water Research*  
400 43:0-1158.
- 401 38. Fan L, Zhang Y, Luo C, Lu F, Qiu H, Sun M. 2012. Synthesis and characterization of magnetic  
402  $\beta$ -cyclodextrin-chitosan nanoparticles as nano-adsorbents for removal of methyl blue.  
403 *International Journal of Biological Macromolecules* 50:0-450.
- 404 39. Chiou MS, Li HY. 2003. Adsorption behavior of reactive dye in aqueous solution on chemical  
405 cross-linked chitosan beads. *Chemosphere* 50:0-1105.
- 406 40. Dogan M, Ozdemir Y, Alkan M. 2007. Adsorption kinetics and mechanism of cationic methyl violet  
407 and methylene blue dyes onto sepiolite. *Dyes and Pigments* 75:701-713.
- 408 41. Zhuang G, Zhang Z, Fu M, Ye X, Liao L. 2015. Comparative study on the use of  
409 cationic-nonionic-organo-montmorillonite in oil-based drilling fluids. *Applied Clay Science*  
410 116:257-262.
- 411 42. Takahashi C, Shirai T, Fuji M. 2012. Study on intercalation of ionic liquid into montmorillonite and  
412 its property evaluation. *Materials Chemistry and Physics* 135:681-686.
- 413 43. Zerda KS, Gerba CP, Hou KC, Goyal SM. 1985. Adsorption of viruses to charge-modified silica. *Appl*  
414 *Environ Microbiol* 49:91-95.

- 415 44. Chattopadhyay S, Puls RW. 1999. Adsorption of Bacteriophages on Clay Minerals. Environmental  
416 Science & Technology 33:3609-3614.
- 417 45. Xue W, He H, Zhu J, Peng Y. 2007. FTIR investigation of CTAB–Al–montmorillonite complexes.  
418 Spectrochimica Acta Part A Molecular & Biomolecular Spectroscopy 67:1030-1036.
- 419 46. Xu W, Johnston CT, Parker P, Agnew SF. 2000. Infrared study of water sorption on Na-, Li-, Ca-, and  
420 Mg-exchanged (SWy-1 and SAz-1) montmorillonite. Clays & Clay Minerals 48:120-131.
- 421 47. Ross PD, Subramanian S. 1981. Thermodynamics of protein association reactions: forces  
422 contributing to stability. Biochemistry 20:3096-3102.

423 **List of Figures**

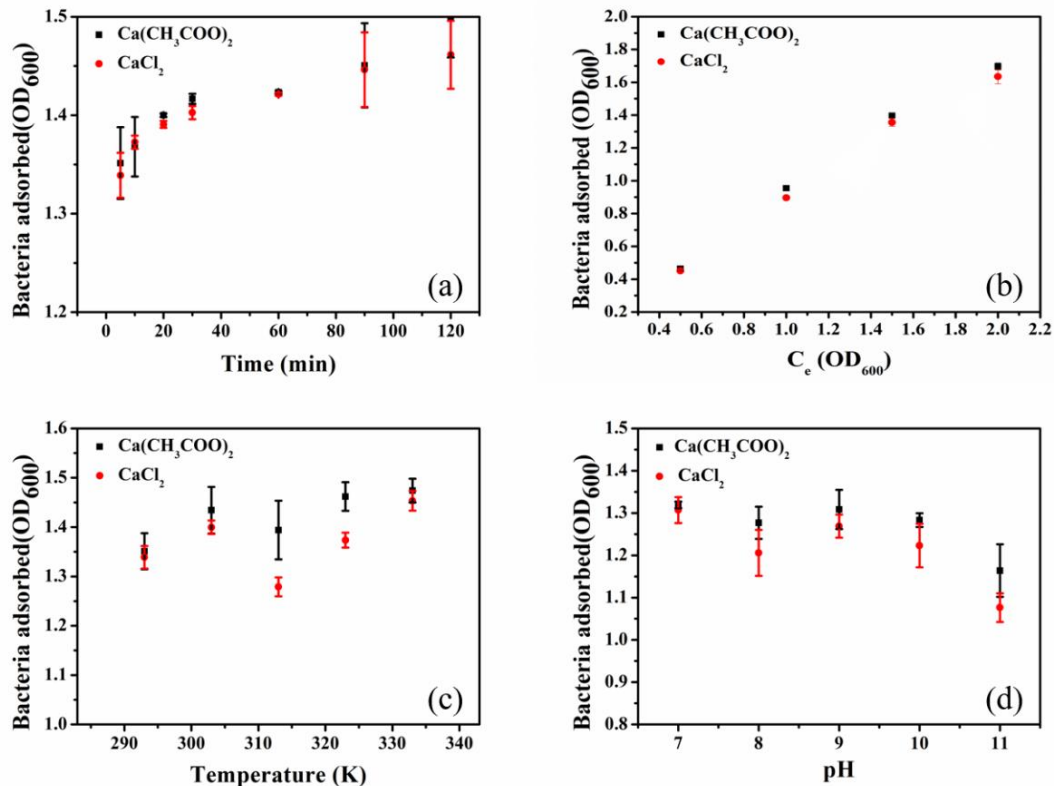

424

425 **Figure 1.** Effect of the contact time (a), bacterial concentration (b), temperature (c) and pH (d) on the

426

adsorption of bacteria onto a Na-MMT surface with 8.1 mmol/L of Ca<sup>2+</sup>



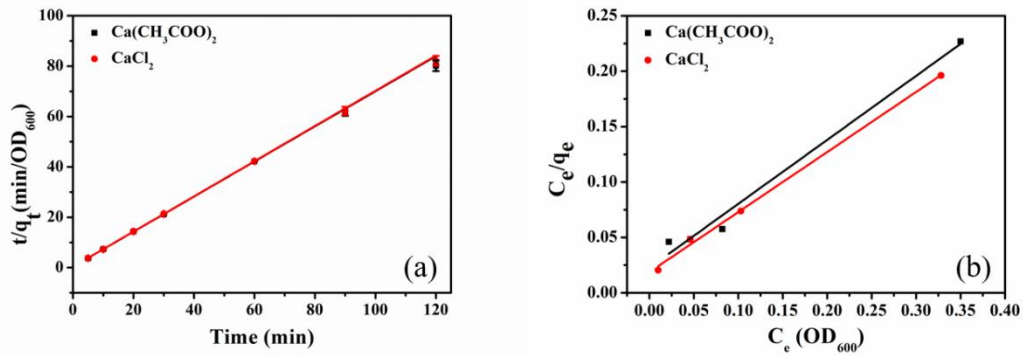

427

428

**Figure 2.** Pseudo-second-order kinetic models (a) and Langmuir isotherm models (b) for the adsorption of the bacteria onto the Na-MMT surface with 8.1 mmol/L of

429

430

Ca<sup>2+</sup>

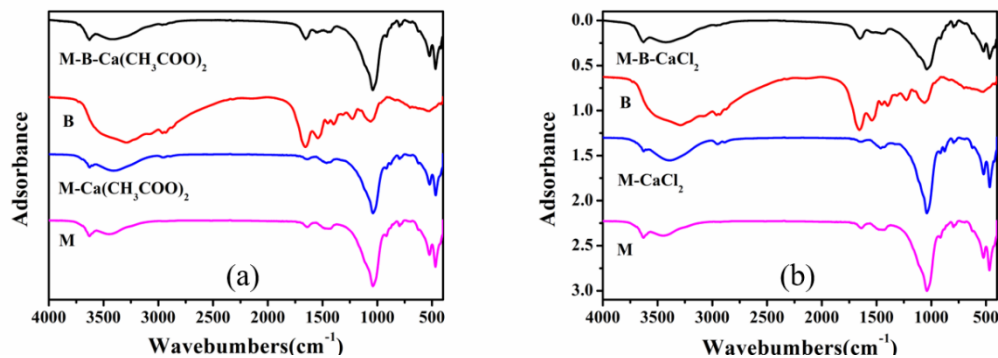

431

432

**Figure 3.** FTIR spectra of Na-MMT, Na-MMT-Ca(CH<sub>3</sub>COO)<sub>2</sub>, Na-MMT-CaCl<sub>2</sub>, bacteria, Na-MMT-Ca(CH<sub>3</sub>COO)<sub>2</sub>-bacteria and Na-MMT -CaCl<sub>2</sub>-bacteria (M, Na-MMT; B, bacteria)

433



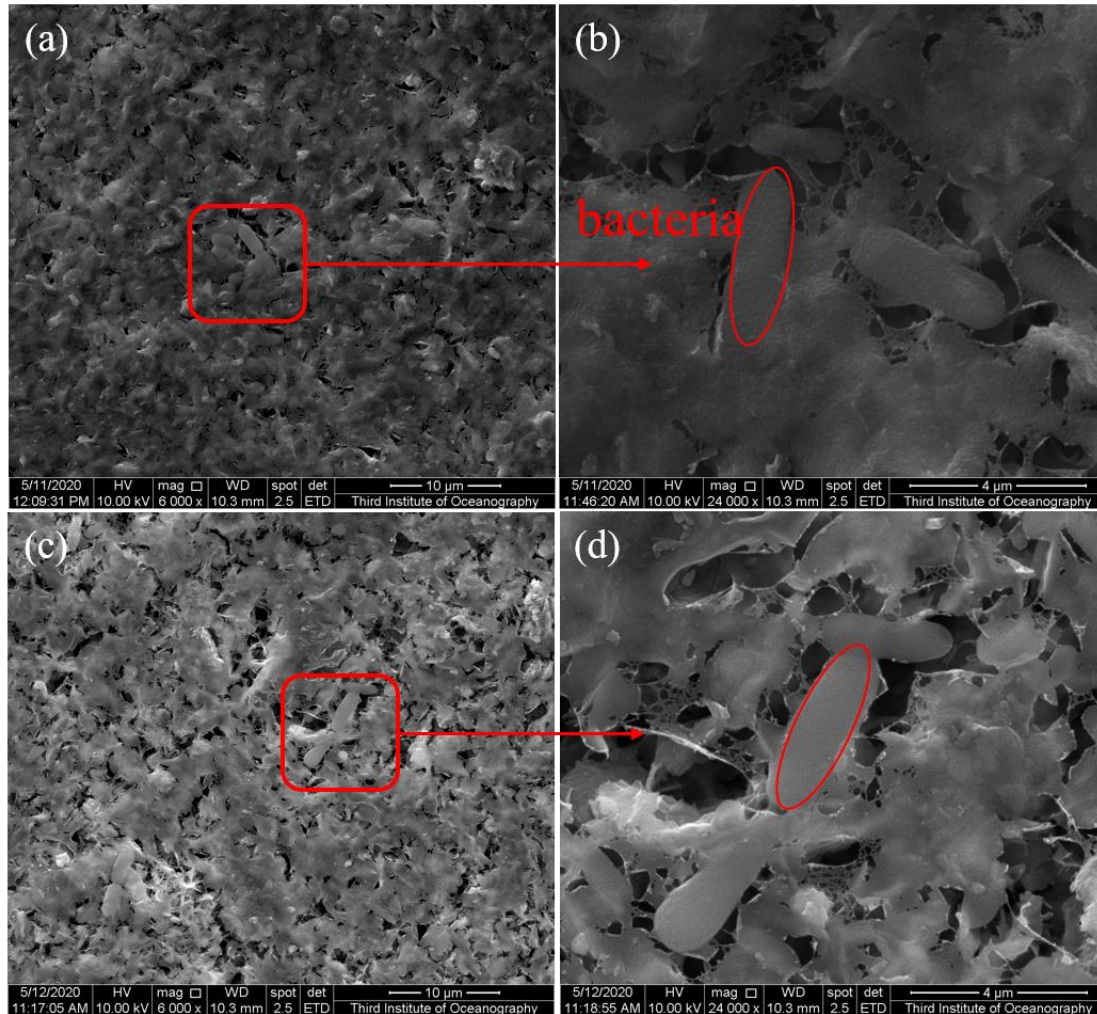

434

435

436

**Figure 4.** Images of the bacterial adsorption onto the Na-MMT surface with the addition of  $\text{Ca}(\text{CH}_3\text{COO})_2$  (a and b) and  $\text{CaCl}_2$  (c and d)

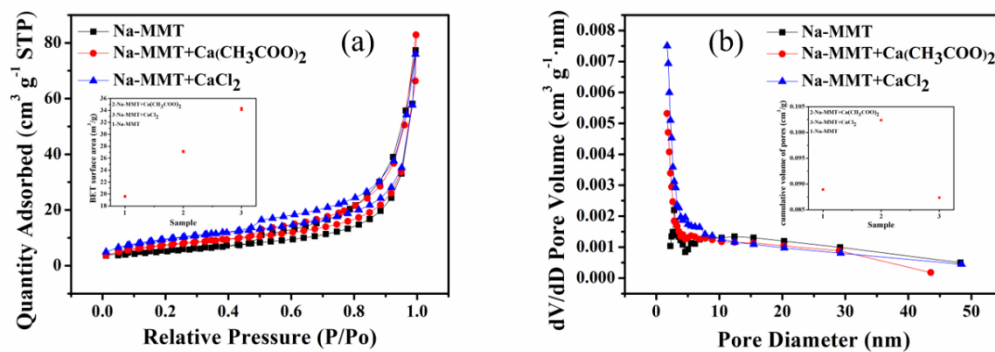

437

438

439

**Figure 5.** Specific surface area and cumulative volume of pores of minerals (Na-MMT, Na-Ca(CH<sub>3</sub>COO)<sub>2</sub> and Na-MMT-CaCl<sub>2</sub>)

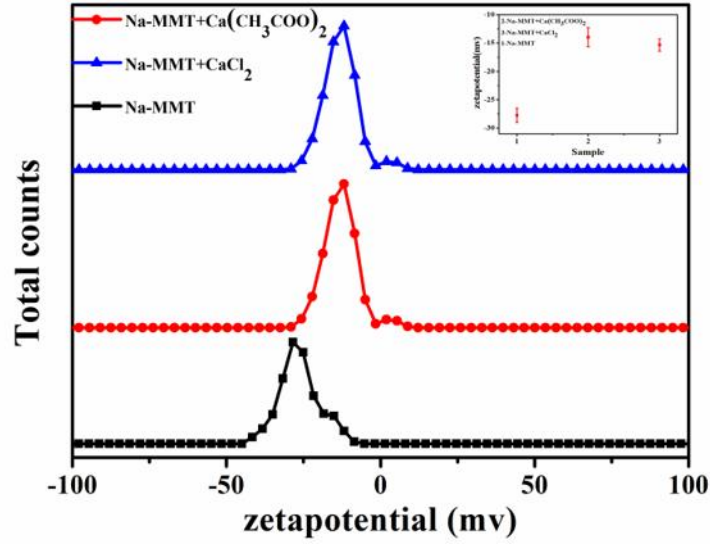

440

441 **Figure 6.** Zeta-potential values of minerals (Na-MMT, Na-MMT-Ca(CH<sub>3</sub>COO)<sub>2</sub> and Na-MMT-CaCl<sub>2</sub>)

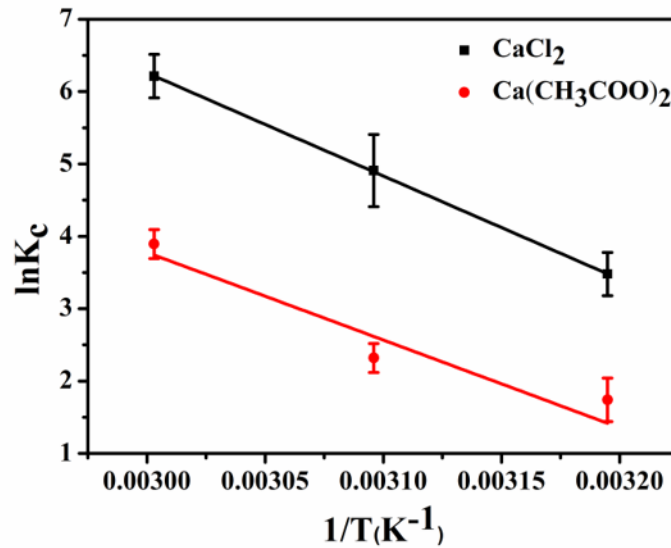

442

443 **Figure 7.** Thermodynamics of the adsorption of the bacteria on the Na-MMT surface with the addition

444

of 8.1 mol L<sup>-1</sup> Ca(CH<sub>3</sub>COO)<sub>2</sub> and CaCl<sub>2</sub>.

445

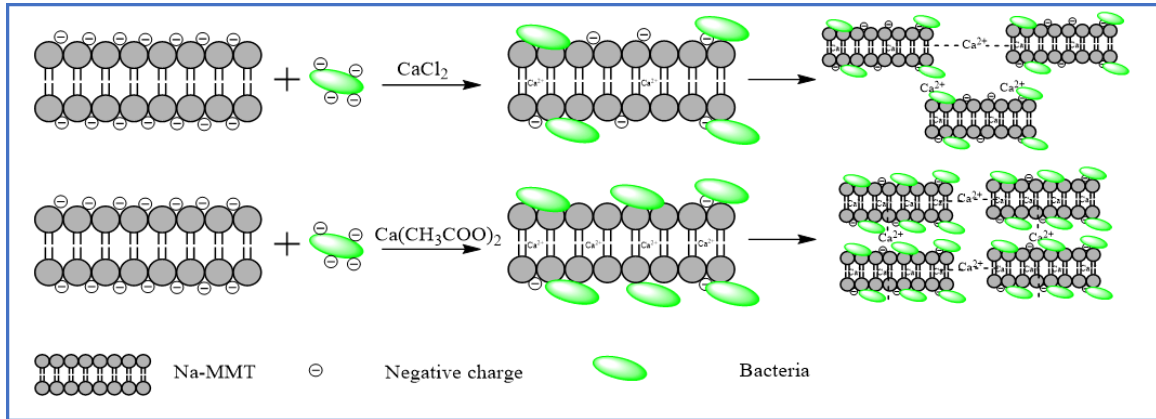

446

447 **Figure 8.** Schematic illustration of the bacterial adsorption process onto the Na-MMT in the presence

448

of  $\text{Ca}^{2+}$ .
